# Supplementary material
Source: HighWire-hosted journal article supplement (https://www.annfammed.org/highwire/filestream/8323/field_highwire_adjunct_files/0/Tai-Seale_Supp_App_1.pdf)
Supplement: Tai-Seale_Supp_App_1.pdf [file Tai-Seale_Supp_App_1.pdf]

Online Supplementary Material

Dohan D, McCuiston MH, Frosch DL, Hung DY, Tai-Seale M. Recognition as a patient-centered medical home: fundamental or incidental?. *Ann Fam Med*. 2013;11(Suppl 1):S14-S18.

[http://www.annfammed.org/content/11/Suppl\\_1/S14](http://www.annfammed.org/content/11/Suppl_1/S14)

---

**Supplemental Appendix 1. Key Informant Interview Guide**

What was your role in the application of NCQA PPC-PCMH recognition process at [the group/clinic]?

What does *patient centered* mean?

- What's the vision for patient-centered care at [the group]?
- How does PCMH fit into it?

What was it about the culture of [the group] as an organization that supported or inhibited PCMH/innovation?

If a large payer were offering special payment for practices that were PCMHs, would [the group] apply for that? Why?

With respect to the ACA and changing market conditions, what's your long-term strategy for [the group]?

- How do you get there?
- How does PCMH fit as a strategic objective? Is it about
  - Efficiency?
  - Patient satisfaction?
  - Outcomes?
  - Market demand?

Imagine [the group] 10 years from now. What does it look like compared to today and how did you get there?

How does [the group's] leadership decide which innovations to endorse and for which to provide organizational and financial incentives?

- How does the organization react to the pressure to change?
- What pushback to innovation has the organization experienced?
- What did it look like?

The spread/replication of innovations can be challenging. How does [the group] handle the replication of programs?

- What have been the barriers?
- What have been the facilitators?

What else should we know? What did we not ask that we should have? What more do you have to add?

---

ACA = Affordable Care Act; NCQA = National Committee for Quality Assurance; PCMH = patient-centered medical home; PPC = Physician Practice Connections.
